# Supplementary material for: Human rabies in Côte d'Ivoire 2014-2016: Results following reinforcements to rabies surveillance
Source: PubMed Central journal article supplement (PMC6126804; doi:10.1371/journal.pntd.0006649), 2018-09-06
Supplement: pntd.0006649.s001.pdf [file pntd.0006649.s001.pdf]

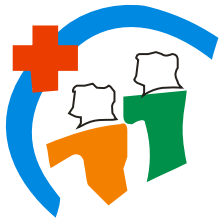

**Projet de renforcement de la surveillance de la rage en côte d'Ivoire RAB42**

*Rapport Final*

*Présenté par Pr Ag Tiembré Issaka, Investigateur coordonateur*

SANOVI PASTEUR 

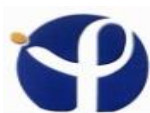

## Liste des Abréviations

CAR : Centre Antirabique

INHP : Institut National d'Hygiène Publique

IPCI : Institut Pasteur de Côte d'Ivoire

SMIT : Service des Maladies infectieuses et Tropicales

Tableau I: Répartition des agents formés dans le cadre du projet RAB42 en fonction de la provenance

| <b>Agents</b>                | <b>Effectif</b> | <b>Pourcentage</b> |
|------------------------------|-----------------|--------------------|
| Agents INHP                  | 293             | 80,05              |
| Agents Districts sanitaires  | 22              | 6,01               |
| Agents services Vétérinaires | 27              | 7,38               |
| Agents services Mairie       | 24              | 6,56               |
| <b>Total</b>                 | <b>366</b>      | <b>100</b>         |

Tableau II : Données des cas de rage humaine de Janvier à décembre 2014, projet RAB 42

| age  | sexe | prof                 | date d'expo     | Localité               | lieu d'hospi                                           | prélèvement d'échantillons | date de décès |
|------|------|----------------------|-----------------|------------------------|--------------------------------------------------------|----------------------------|---------------|
| *21  | M    | Electricien batiment | 27/11/2013      | Terre rouge (sanpedro) | néant                                                  | non                        | 30-déc-13     |
| *42  | M    | Planteur             | fin nov 2013    | Bouali (Daloa)         | Maladies Infectieuses et Tropicales du CHU Treichville | non                        | 26-janv-14    |
| 84   | F    | Ménagère             | déc 2013        | NZUEKRO (Bouaké)       | CHU Bouaké                                             | oui: 1,2 et 3              | 04-févr-14    |
| 4    | F    | ELEVE                | janv 2014       | Aboudoukro (Niablé)    | CHR Abengourou                                         | oui: 1,2 et 3              | EVADEE        |
| 13   | F    | ELEVE                | déc 2013        | FRESCO                 | néant                                                  | oui: 1,2 et 3              | 14-mars-14    |
| 30   | M    | Manœuvre agricole    | 02/02/2014      | VROUHO 2               | CHR Ségula                                             | oui: 1 et 2                | 02-avr-14     |
| 46   | M    | Planteur             | fevrier 2014    | DIGNANGO               | néant                                                  | oui: 1 et 2                | 09-avr-14     |
| 41   | M    | Agent immobilier     | fevrier 2014    | YOPOUGON Gesco         | CHU Treichville (SMIT)                                 | oui: 1 et 3                | 17-avr-14     |
| **30 | F    | Ménagère             | 1er avril 2014  | Tahou (Kouibly)        | néant                                                  | oui: 1 et 2                | 19-mai-14     |
| 9    | M    | Elève                | 06 Juillet 2014 | Abengourou             | CHR Abengourou                                         | oui: 1 , 2 et 3            | 13 Aout 2014  |
| 22   | M    | Sans                 | 19 Juin 2014    | Iboklebe (Tabou)       | CHR San - Pédro                                        | oui: 2                     | 17 Aout 2014  |
| 6    | M    | ELEVE                | aout 2014       | Séguela                | CHR Séguela                                            | oui: 1,2 et 3              | 21-oct-14     |

|      |   |          |                |                    |                            |               |                |
|------|---|----------|----------------|--------------------|----------------------------|---------------|----------------|
| 37   | F | Ménagère | Octobre 2014   | Sidama (Kong)      | HG ferké                   | oui: 1 et 2   | 22-nov-14      |
| **43 | F | Ménagère | Septembre 2014 | Bettié (M'batakro) | HG Bettié / CHR Abengourou | oui: 2        | 18-déc-14      |
| 34   | F | Ménagère | Novembre 2014  | gbeleban (Odienné) | CHR Odienné                | oui: 1,2 et 3 | encore vivante |

\* : *Cas suspects non prélevés survenus avant la formation des agents*

\*\* : *Prélèvements non conformes*

Figure 1 : Exposition à la rage humaine par mois de Janvier à décembre 2014, projet RAB 42

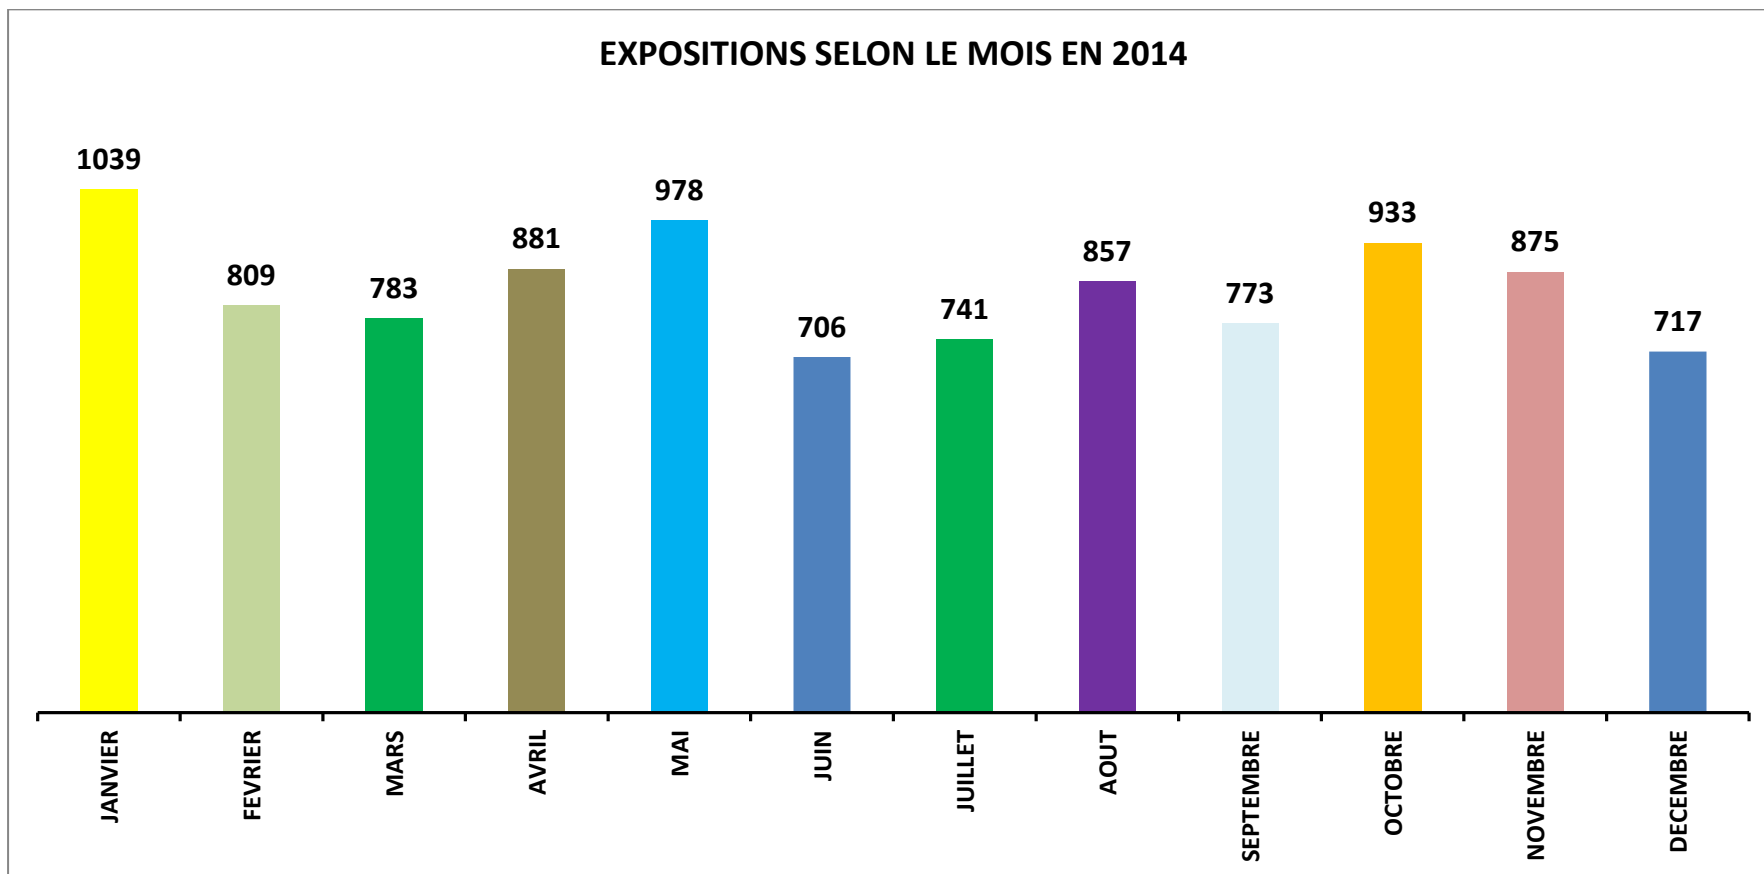

Figure 2 : Exposition à la rage humaine par antenne de Janvier à décembre 2014, projet RAB 42

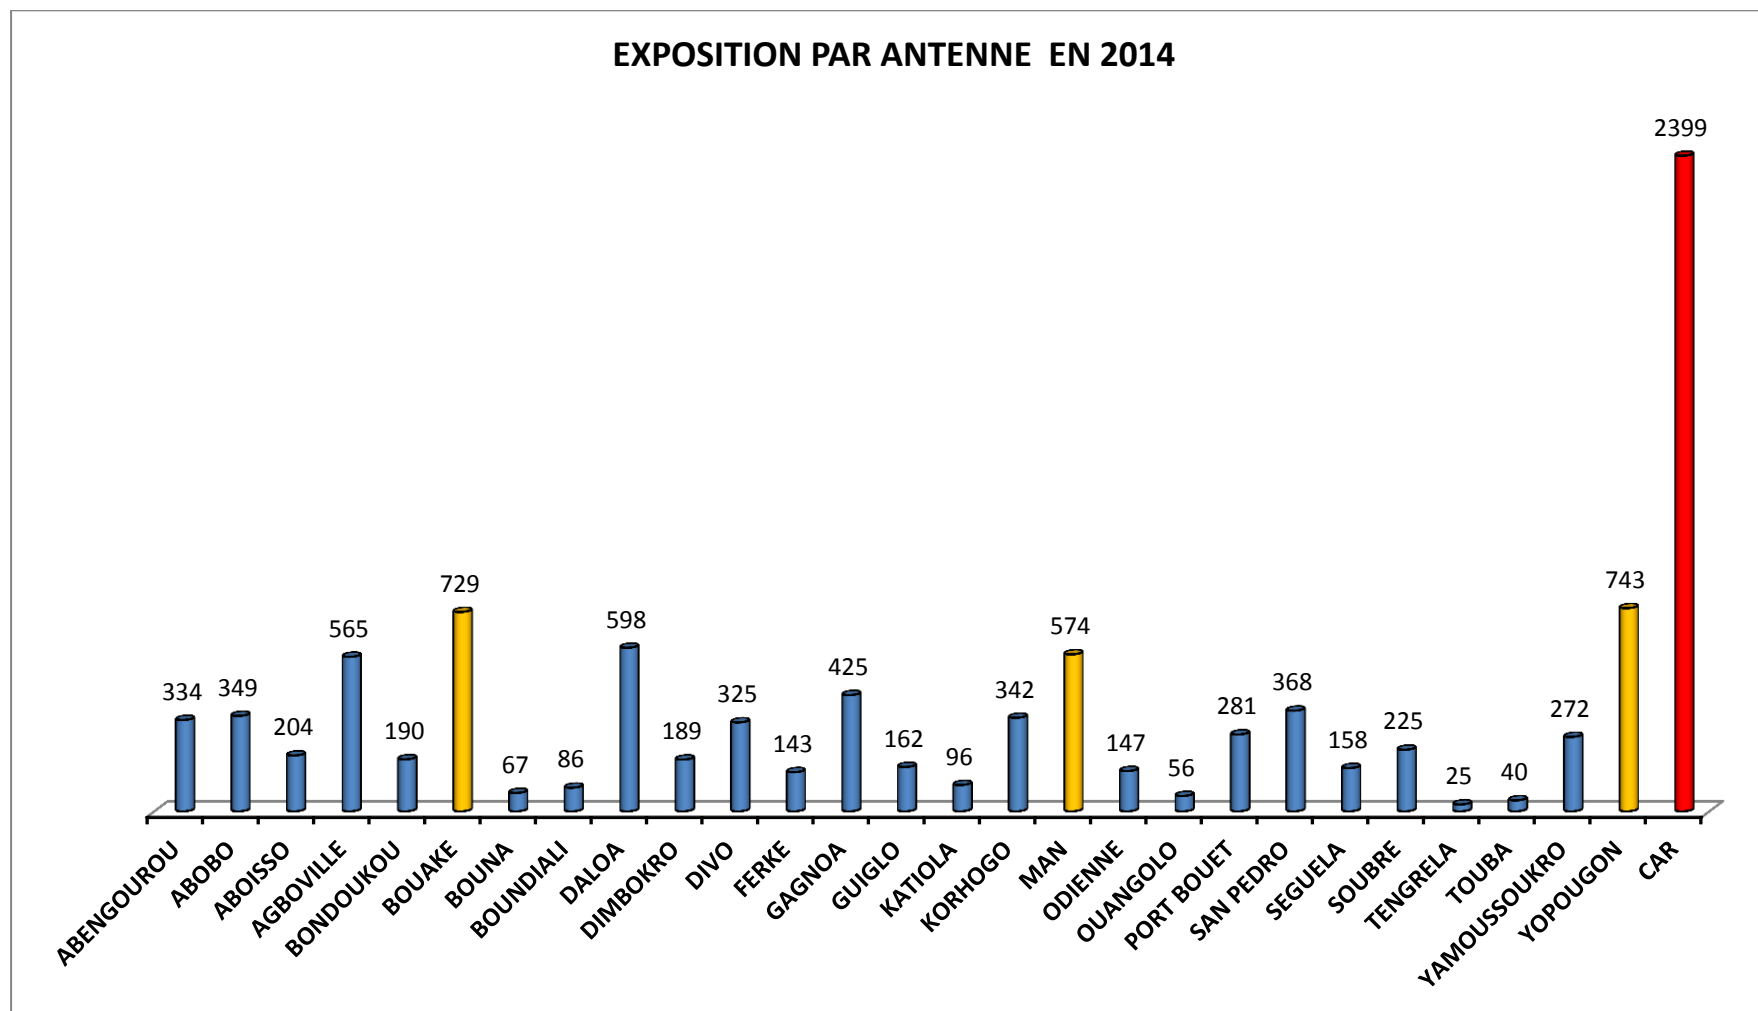

**Tableau III : Cas d'exposition à la rage humaine en 2014 par âge et par antenne**

| <b>ANTENNES</b> | <b>0-5 ANS</b> | <b>6-15 ANS</b> | <b>➤ 15 ANS</b> | <b>TOTAL</b> |
|-----------------|----------------|-----------------|-----------------|--------------|
| ABENGOUROU      | 45             | 136             | 153             | 334          |
| ABOBO           | 50             | 152             | 147             | 349          |
| ABOISSO         | 23             | 81              | 100             | 204          |
| AGBOVILLE       | 73             | 211             | 281             | 565          |
| BONDOUKOU       | 26             | 80              | 84              | 190          |
| BOUAKE          | 108            | 299             | 322             | 729          |
| BOUNA           | 13             | 8               | 46              | 67           |
| BOUNDIALI       | 11             | 44              | 31              | 86           |
| DALOA           | 85             | 270             | 243             | 598          |
| DIMBOKRO        | 23             | 77              | 89              | 189          |
| DIVO            | 48             | 122             | 155             | 325          |
| FERKESSEDOUGOU  | 20             | 69              | 54              | 143          |
| GAGNOA          | 39             | 161             | 225             | 425          |
| GUILGLO         | 21             | 59              | 82              | 162          |
| KATIOILA        | 12             | 34              | 50              | 96           |
| KORHOGO         | 55             | 139             | 148             | 342          |
| MAN             | 97             | 226             | 251             | 574          |
| ODIENNE         | 24             | 60              | 63              | 147          |
| OUANGOLO        | 12             | 31              | 13              | 56           |
| PORT-BOUET      | 51             | 88              | 142             | 281          |
| SAN PEDRO       | 38             | 168             | 162             | 368          |
| SEQUELA         | 33             | 57              | 68              | 158          |
| SOUBRE          | 33             | 97              | 95              | 225          |
| TENGRELA        | 5              | 4               | 16              | 25           |
| TOUBA           | 4              | 14              | 22              | 40           |
| YAMOOUSSOUKRO   | 27             | 109             | 136             | 272          |
| YOPOUGON        | 78             | 304             | 361             | 743          |
| CAR TREICHVILLE | 276            | 808             | 1315            | 2399         |
| <b>TOTAL</b>    | <b>1330</b>    | <b>3908</b>     | <b>4854</b>     | <b>10092</b> |
