# Supplementary material for: Human rabies in Côte d'Ivoire 2014-2016: Results following reinforcements to rabies surveillance
Source: PubMed Central journal article supplement (PMC6126804; doi:10.1371/journal.pntd.0006649), 2018-09-06
Supplement: pntd.0006649.s002.pdf [file pntd.0006649.s002.pdf]

# Projet de renforcement de la surveillance de la rage en Côte d'Ivoire RAB42

Rapport préliminaire du projet – Janvier - décembre 2015

*Présenté par Professeur Tiembré Issaka, Investigateur coordonnateur*

10 Aout 2016

## I. Résultats

### II.1. Point sur les cas de rage humaine

#### II.1.1. Qualité des prélèvements

Tableau I : Répartition des prélèvements selon la qualité, Projet RAB42, 2015

| Qualité du prélèvement     | Effectif  | Pourcentage |
|----------------------------|-----------|-------------|
| Non prélevés               | 6         | 35,3        |
| Prélèvements Conformés     | 5         | 29,4        |
| Prélèvements non Conformés | 6         | 35,3        |
| <b>Total</b>               | <b>17</b> | <b>100</b>  |

#### II.1.2. Epidémiologie descriptive des cas

- Répartition géographique des cas

Au cours de l'année 2015, sur les dix-sept (17) cas suspects de rage humaine détectés 5 ont été confirmés par l'IPCI soit 29,4% dont la répartition est dans la figure 1.

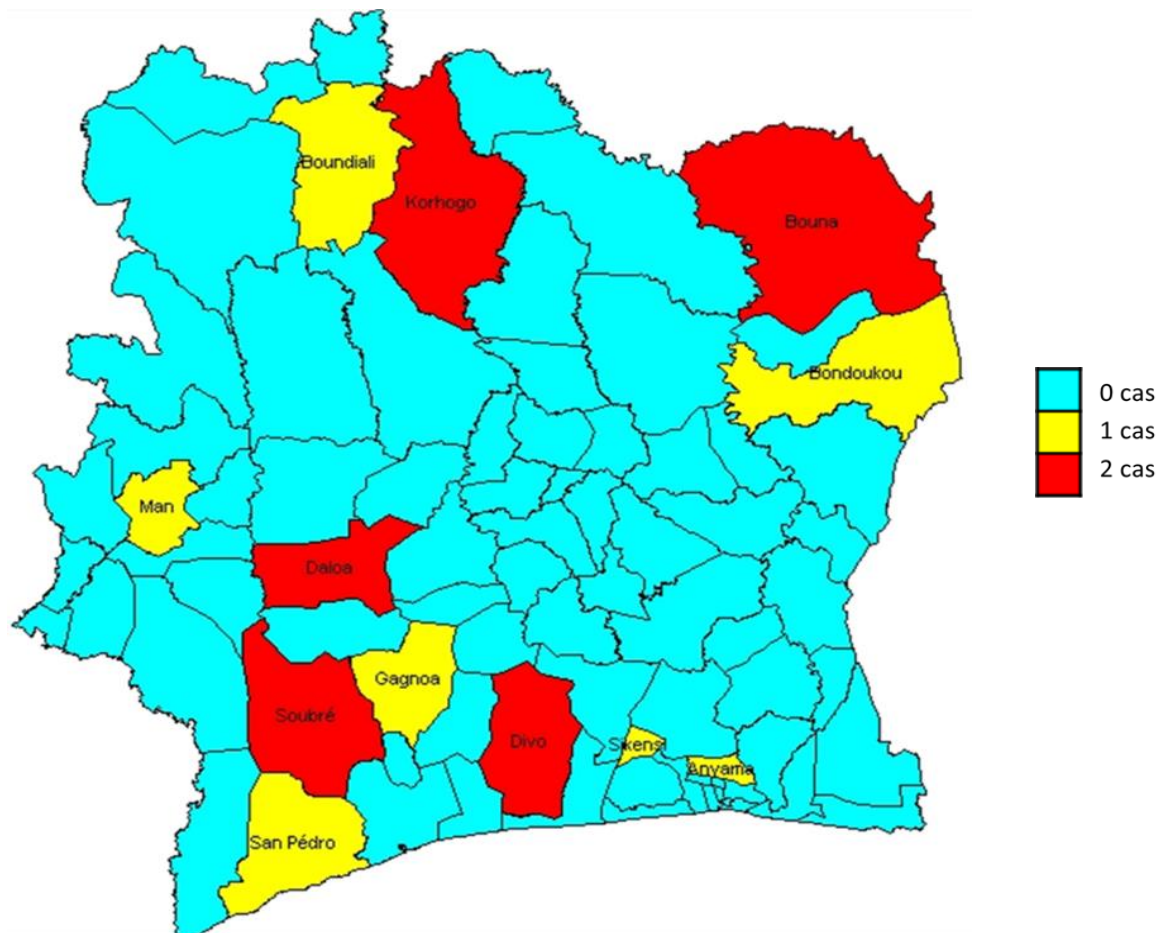

Figure 1 : distribution des cas suspects de rage humaine, Cote d'Ivoire, 2015

Tableau II : Répartition des patients selon la profession

| Profession              | Nombre    | Pourcentage |
|-------------------------|-----------|-------------|
| Sans profession         | 6         | 35,30       |
| Ménagère                | 5         | 29 ,40      |
| Elevé                   | 3         | 16,65       |
| Planteur ou cultivateur | 3         | 16,65       |
| <b>Total</b>            | <b>17</b> | <b>100</b>  |

**Tableau III : Répartition des personnes exposées à la rage, 2015 par tranche d'âge.**

| <b>Tranche d'âge</b> | <b>Nombre de cas d'exposition</b> |
|----------------------|-----------------------------------|
| 0-5 ans              | 1505                              |
| 6-15 ans             | 4348                              |
| > 15 ans             | 5064                              |
| <b>Total</b>         | <b>10 917</b>                     |

**Tableau IV : Données des cas de rage humaine de Janvier à décembre 2015, projet RAB 42**

| Semaine de Notification | Age (Année) | Sexe | Profession | Animal | Date expo | Localité             | Prélèvement échantillons | date de décès | District sanitaire |
|-------------------------|-------------|------|------------|--------|-----------|----------------------|--------------------------|---------------|--------------------|
| 2                       | 24          | F    | Ménagère   | chien  | 01 /12/14 | Logoualé             | oui: 1,2 et 3            | 10/01/15      | MAN*               |
| 4                       | 5           | M    | Néant      | chien  | 25/12/14  | Koraleara (Korhogo)  | oui: 2 et 3              | 23/01/15      | Korhogo*           |
| 12                      | 60          | F    | Ménagère   | chat   | 26 /02/15 | Progreagui (Méagui)  | oui: 1                   | 24/03/15      | Soubre**           |
| 13                      | 9           | F    | Néant      | chien  | 01/01.15  | Gadago (grand-zatri) | oui: 1                   | 22/03/15      | Soubre**           |
| 15                      | 73          | M    | Planteur   | chien  | 25/02/15  | Sikensi              | Non                      | 11/04/15      | Sikensi***         |
| 15                      | 60          | F    | Ménagère   | chat   | 14 /03/15 | Anyama               | Oui: 1 et 2              | 18/04/15      | Anyama*            |
| 20                      | 8           | M    | élève      | Chien  | 08 /04/15 | Hiré                 | Non                      | 13/05/15      | DIVO***            |
| 21                      | 34          | M    | Planteur   | Chien  | 24 /02/15 | Gagnoa               | Non                      | 24/05/15      | Gagnoa***          |
| 22                      | 15          | M    | élève      | Chien  | 01 /12/14 | San-pédro            | Oui: 2                   | 27/05/15      | San-Pédro***       |
| 25                      | 17          | F    | Ménagère   | chiot  | 13 /04/15 | Daloa                | Oui: 1 et 2              | 21/06/15      | Daloa*             |
| 31                      | 4           | F    | Néant      | Chien  | 15/07/15  | Divo                 | Oui: 1 et 2              | 24/07/15      | Divo**             |
| 32                      | 4           | M    | Néant      | Chien  | inconnu   | Boundiali            | Oui: 2                   | 03/08/15      | Boundiali*         |
| 38                      | 9           | M    | élève      | chien  | 16 /08/15 | Gogobio              | Oui: 1 et 3              | 20/09/15      | Daloa**            |
| 43                      | 19          | F    | Ménagère   | chien  | 30 /09/15 | Wonanfanyon          | Non Prélevé              | 21/10/15      | Bouna***           |

|    |    |   |             |       |           |                      |             |          |             |
|----|----|---|-------------|-------|-----------|----------------------|-------------|----------|-------------|
| 48 | 4  | M | Sans        | chien | 23 /10/15 | Dikodougou           | Oui: 2      | 23/11/15 | Korhogo**   |
| 49 | 32 | F | Cultivateur | Chien | 03 /11/15 | Bondoyo<br>(Nassian) | Non Prélevé | 30/11/15 | Bouna***    |
| 50 | 5  | M | néant       | Chien | 13 /11/15 | Abokro(Assuefry)     | Oui: 1 et 3 | 19/12/15 | Bondoukou** |

Clés de couleur : cas confirmés par l'IPCI ; prélèvement non conforme ; cas non prélevés.

Clés d'échantillons : 1 = salive ; 2 = peau ; 3 = urines

F, femelle ; M, mâle; N ; non enregistré
