# Supplementary material for: Human rabies in Côte d'Ivoire 2014-2016: Results following reinforcements to rabies surveillance
Source: PubMed Central journal article supplement (PMC6126804; doi:10.1371/journal.pntd.0006649), 2018-09-06
Supplement: pntd.0006649.s003.pdf [file pntd.0006649.s003.pdf]

Tableau1 : Nature de l'exposition

| NaturExpo    | Fréquence | Pourcentage    |
|--------------|-----------|----------------|
| Griffure     | 2         | 5.30%          |
| Morsure      | 36        | 94.70%         |
| <b>Total</b> | <b>38</b> | <b>100.00%</b> |

Tableau2 : L'animal responsable

| Animal Responsable | Fréquence | Pourcentage    |
|--------------------|-----------|----------------|
| Chien              | 36        | 94.70%         |
| Chat               | 2         | 5.30%          |
| <b>Total</b>       | <b>38</b> | <b>100.00%</b> |

Tableau3 : Provenance des cas

| Prov Cas     | Fréquence | Pourcentage    |
|--------------|-----------|----------------|
| Village      | 25        | 65.80%         |
| Ville        | 13        | 34.20%         |
| <b>Total</b> | <b>38</b> | <b>100.00%</b> |

Tableau4 : Lavage de la plaie

| LavPlaie     | Fréquence | Pourcentage    |
|--------------|-----------|----------------|
| Oui          | 4         | 10.50%         |
| Non          | 34        | 89.50%         |
| <b>Total</b> | <b>38</b> | <b>100.00%</b> |

Tableau5 : Administration de SAT

| Ad SAT       | Fréquence | Pourcentage    |
|--------------|-----------|----------------|
| Oui          | 7         | 18,4%          |
| Non          | 29        | 76,3%          |
| Non précisé  | 2         | 5,3%           |
| <b>Total</b> | <b>38</b> | <b>100.00%</b> |

Tableau6 : Désinfection plaie

| DésinfPlaie  | Fréquence | Pourcentage    |
|--------------|-----------|----------------|
| Oui          | 7         | 18,4%          |
| Non          | 29        | 76,3%          |
| Non précisé  | 2         | 5,3%           |
| <b>Total</b> | <b>38</b> | <b>100.00%</b> |

Tableau7 : Forme de rage

| RagFurieuse  | Fréquence | Pourcentage    |
|--------------|-----------|----------------|
| Oui          | 37        | 97.40%         |
| Non          | 1         | 2.60%          |
| <b>Total</b> | <b>38</b> | <b>100.00%</b> |

Tableau8 : Cas prélevés

| PrelevEchantillons | Fréquence | Pourcentage    |
|--------------------|-----------|----------------|
| Oui                | 28        | 73.70%         |
| Non                | 10        | 26.30%         |
| <b>Total</b>       | <b>38</b> | <b>100.00%</b> |

Tableau9 : Cas Résultats d'analyses

| Résultats analyses | Fréquence | Pourcentage    |
|--------------------|-----------|----------------|
| Confirmés          | 22        | 78.60%         |
| Inadéquats         | 6         | 21.40%         |
| <b>Total</b>       | <b>28</b> | <b>100.00%</b> |

**Tableau10 : Post-exposure treatments**

| Thorough cleansing of the wound = (lavage de la plaie)             | Number of cases(nbre de cas)   | Percentage(pourcentage) |
|--------------------------------------------------------------------|--------------------------------|-------------------------|
| Yes                                                                | 21711                          | 82%                     |
| No                                                                 | 4922                           | 18%                     |
| Unknown = (ne sait pas)                                            |                                |                         |
| Anti-tetanic vaccine                                               |                                |                         |
| Yes                                                                | 2875                           | 11%                     |
| No                                                                 | 23758                          | 89%                     |
| Unknown                                                            |                                |                         |
| Anti-rabiesserum (immunoglobuline)                                 |                                |                         |
| Yes                                                                | 0                              |                         |
| No                                                                 | 0                              |                         |
| Unknown                                                            |                                |                         |
| Rabies vaccine schedule = (protocole antirabique)                  |                                |                         |
| Yes                                                                | ZAGREB = 21340<br>ESSEN = 5293 | 80%<br>20%              |
| If yes, finished vaccine schedule (respect du calendrier vaccinal) |                                |                         |
| Yes                                                                | 15147                          | 57%                     |
| No                                                                 | 11486                          | 43%                     |
| Unknown                                                            |                                |                         |
| No                                                                 |                                |                         |
| Unknown                                                            |                                |                         |
| <b>TOTAL</b>                                                       | <b>26633</b>                   | <b>100%</b>             |

*Taux d'incidence :*

| INHP center    | Population | Nb bites 2014 | Nb bites 2015 | Nb bites Jan-June 2016 | Total | Incidence rate (/100 000) 2014 | Incidence rate (/100 000) 2015 | Estimated incidence rate (/100 000) 2016 * | Mean yearly incidence rate (/100 000) TOTAL |
|----------------|------------|---------------|---------------|------------------------|-------|--------------------------------|--------------------------------|--------------------------------------------|---------------------------------------------|
| Treichville    | 1727420    | 2320          | 2087          | 931                    | 5338  | 134.3                          | 120.8                          | 107.8                                      | <b>123.6</b>                                |
| Port Bouet     | 978726     | 281           | 497           | 273                    | 1051  | 28.7                           | 50.8                           | 55.8                                       | <b>43.0</b>                                 |
| Yopougon       | 2983898    | 743           | 821           | 486                    | 2050  | 24.9                           | 27.5                           | 32.6                                       | <b>27.5</b>                                 |
| Abengourou     | 580391     | 334           | 273           | 149                    | 756   | 57.5                           | 47.0                           | 51.3                                       | <b>52.1</b>                                 |
| Agboville      | 1031077    | 565           | 589           | 262                    | 1416  | 54.8                           | 57.1                           | 50.8                                       | <b>54.9</b>                                 |
| Bondoukou      | 767959     | 190           | 296           | 230                    | 716   | 24.7                           | 38.5                           | 59.9                                       | <b>37.3</b>                                 |
| Bouaké         | 1193011    | 729           | 766           | 458                    | 1953  | 61.1                           | 64.2                           | 76.8                                       | <b>65.5</b>                                 |
| Bouna          | 262893     | 67            | 101           | 35                     | 203   | 25.5                           | 38.4                           | 26.6                                       | <b>30.9</b>                                 |
| Boundiali      | 240319     | 86            | 97            | 45                     | 228   | 35.8                           | 40.4                           | 37.5                                       | <b>37.9</b>                                 |
| Dimbokro       | 932199     | 189           | 165           | 101                    | 455   | 20.3                           | 17.7                           | 21.7                                       | <b>19.5</b>                                 |
| Divo           | 1002723    | 325           | 370           | 216                    | 911   | 32.4                           | 36.9                           | 43.1                                       | <b>36.3</b>                                 |
| Ferkessedougou | 259402     | 143           | 158           | 92                     | 393   | 55.1                           | 60.9                           | 70.9                                       | <b>60.6</b>                                 |
| Gagnoa         | 798308     | 425           | 432           | 198                    | 1055  | 53.2                           | 54.1                           | 49.6                                       | <b>52.9</b>                                 |
| Guiglo         | 747958     | 162           | 216           | 80                     | 458   | 21.7                           | 28.9                           | 21.4                                       | <b>24.5</b>                                 |
| Katiola        | 395885     | 96            | 145           | 68                     | 309   | 24.2                           | 36.6                           | 34.4                                       | <b>31.2</b>                                 |
| Korhogo        | 610844     | 342           | 374           | 221                    | 937   | 56.0                           | 61.2                           | 72.4                                       | <b>61.4</b>                                 |
| Man            | 1377035    | 574           | 675           | 342                    | 1591  | 41.7                           | 49.0                           | 49.7                                       | <b>46.2</b>                                 |
| Odienné        | 447097     | 147           | 174           | 98                     | 419   | 32.9                           | 38.9                           | 43.8                                       | <b>37.5</b>                                 |
| Ouangolodougou | 162905     | 56            | 42            | 20                     | 118   | 34.4                           | 25.8                           | 24.6                                       | <b>29.0</b>                                 |
| Tengrela       | 93583      | 25            | 26            | 10                     | 61    | 26.7                           | 27.8                           | 21.4                                       | <b>26.1</b>                                 |

|              |                 |              |              |             |              |             |             |             |             |
|--------------|-----------------|--------------|--------------|-------------|--------------|-------------|-------------|-------------|-------------|
| Touba        | 204770          | 40           | 46           | 22          | 108          | 19.5        | 22.5        | 21.5        | <b>21.1</b> |
| Yamoussoukro | 1222346         | 272          | 361          | 206         | 839          | 22.3        | 29.5        | 33.7        | <b>27.5</b> |
| Aboisso      | 474176          | 204          | 272          | 106         | 582          | 43.0        | 57.4        | 44.7        | <b>49.1</b> |
| Daloa        | 1836975         | 598          | 629          | 296         | 1523         | 32.6        | 34.2        | 32.2        | <b>33.2</b> |
| Séguéla      | 513819          | 158          | 142          | 69          | 369          | 30.8        | 27.6        | 26.9        | <b>28.7</b> |
| San Pedro    | 1017997         | 368          | 367          | 169         | 904          | 36.1        | 36.1        | 33.2        | <b>35.5</b> |
| Soubré       | 1033187         | 225          | 228          | 112         | 565          | 21.8        | 22.1        | 21.7        | <b>21.9</b> |
| Abobo        | 1030658         | 349          | 568          | 408         | 1325         | 33.9        | 55.1        | 79.2        | <b>51.4</b> |
| <b>TOTAL</b> | <b>23927561</b> | <b>10013</b> | <b>10917</b> | <b>5703</b> | <b>26633</b> | <b>41.8</b> | <b>45.6</b> | <b>47.7</b> | <b>44.5</b> |

## Répartition géographique des cas

Tableau de répartition des cas par CAR INHP

| CAR INHP        | Nbre de cas 2014 | Nbre de cas 2015 | Nbre de cas Janv-Juin 2016 | TOTAL     |
|-----------------|------------------|------------------|----------------------------|-----------|
| Abengourou      | 3                | 0                | 0                          | 3         |
| Adzope          | 0                | 0                | 1                          | 1         |
| Bondoukou       | 0                | 2                | 0                          | 2         |
| Bouake          | 1                | 0                | 0                          | 1         |
| Bouna           | 0                | 1                | 0                          | 1         |
| Boundiali       | 0                | 1                | 0                          | 1         |
| CAR Treichville | 0                | 2                | 0                          | 2         |
| Daloa           | 1                | 2                | 0                          | 3         |
| Divo            | 0                | 2                | 1                          | 3         |
| Ferke           | 1                | 0                | 0                          | 1         |
| Gagnoa          | 2                | 1                | 2                          | 5         |
| Guiglo          | 0                | 0                | 1                          | 1         |
| Korhogo         | 0                | 2                | 0                          | 2         |
| Man             | 1                | 1                | 0                          | 2         |
| Odienne         | 1                | 0                | 0                          | 1         |
| San Pedro       | 2                | 1                | 0                          | 3         |
| Seguela         | 2                | 0                | 1                          | 3         |
| Soubre          | 0                | 2                | 0                          | 2         |
| Yopougon        | 1                | 0                | 0                          | 1         |
| <b>TOTAL</b>    | <b>15</b>        | <b>17</b>        | <b>6</b>                   | <b>38</b> |

Tableau de répartition des cas par District sanitaire

| District Sanitaire | Nbre cas 2014 | Nbre cas 2015 | Nbre cas Janv-Juin 2016 | TOTAL |
|--------------------|---------------|---------------|-------------------------|-------|
| <b>Abengourou</b>  | 2             | 0             | 0                       | 2     |
| <b>Adzope</b>      | 0             | 0             | 1                       | 1     |
| <b>Anyama</b>      | 0             | 1             | 0                       | 1     |
| <b>Bettie</b>      | 1             | 0             | 0                       | 1     |
| <b>Bondoukou</b>   | 0             | 1             | 0                       | 1     |
| <b>Bouake Sud</b>  | 1             | 0             | 0                       | 1     |
| <b>Bouna</b>       | 0             | 1             | 0                       | 1     |
| <b>Boundiali</b>   | 0             | 1             | 0                       | 1     |

|                |    |    |   |           |
|----------------|----|----|---|-----------|
| Daloa          | 1  | 2  | 0 | 3         |
| Divo           | 1  | 2  | 1 | 4         |
| Ferke          | 1  | 0  | 0 | 1         |
| Gagnoa         | 1  | 1  | 1 | 3         |
| Guiglo         | 0  | 0  | 1 | 1         |
| Korhogo        | 0  | 2  | 0 | 2         |
| Kouibly        | 1  | 0  | 0 | 1         |
| Man            | 0  | 1  | 0 | 1         |
| Nassian        | 0  | 1  | 0 | 1         |
| Odienne        | 1  | 0  | 0 | 1         |
| Oume           | 0  | 0  | 1 | 1         |
| San Pedro      | 1  | 1  | 0 | 2         |
| Seguela        | 2  | 0  | 0 | 2         |
| Sikensi        | 0  | 1  | 0 | 1         |
| Soubre         | 0  | 2  | 0 | 2         |
| Tabou          | 1  | 0  | 0 | 1         |
| Vavoua         | 0  | 0  | 1 | 1         |
| Yopougon Ouest | 1  | 0  | 0 | 1         |
| <b>TOTAL</b>   | 15 | 17 | 6 | <b>38</b> |
