# Supplementary material for: Human rabies in Côte d'Ivoire 2014-2016: Results following reinforcements to rabies surveillance
Source: PubMed Central journal article supplement (PMC6126804; doi:10.1371/journal.pntd.0006649), 2018-09-06
Supplement: pntd.0006649.s004.pdf [file pntd.0006649.s004.pdf]

### Cas de la rage pour 2016

| (Semaine Notificatio n) | âge (ans ) | sex e | profession        | animal responsable | date d'exposition | Localité           | prélèvement d'échantillo ns | date de décès | Distrist sanitaire |
|-------------------------|------------|-------|-------------------|--------------------|-------------------|--------------------|-----------------------------|---------------|--------------------|
| 1                       | 19         | M     | élève             | chien              | 06 décembre 2015  | Oumé               | Oui: 1 et 3                 | 09-janv-16    | Oumé               |
| 1                       | 6          | F     | Sans              | chien              | 10 décembre 2015  | Vavoua             | Oui: 1,2 et 3               | 10-janv-16    | Vaoua              |
| 6                       | 7          | F     | élève             | chien              | 21 novembre 2015  | Zikisso            | Non                         | 10-févr-16    | Gagnoa             |
| 7                       | 10         | M     | élève             | chien              | janvier 2016      | Fresco             | Oui: 1,2 et 3               | 20-févr-16    | Divo               |
| 8                       | 13         | M     | élève             | chien              | Non précisé       | Taï                | Non                         | évadé         | Guiglo             |
| 12                      | 18         | M     | élève             | chien              | 06 février 2016   | Adzopé             | Non                         | 14-mars-16    | Adzopé             |
| 29                      | 13         | F     | Sans              | chien              | mai 2016          | Bingerville        | Oui: 1                      | 21-juil-16    | Cocody-Bingerville |
| 30                      | 4          | M     | Sans              | chien              | 03 juillet 2016   | Abobo              | Oui: 1 et 3                 | 30-juil-16    | Abobo-Ouest        |
| 31                      | 29         | M     | Planteur          | chien              | 06 juillet 2016   | Tiassalé (Bacanda) | Non                         | 01 aout 2016  | Tiassalé           |
| 32                      | 35         | M     | Agent mairie      | chien              | juillet 2016      | Gabiadji           | Oui: 2                      | 14 aout 2016  | San Pedro          |
| 34                      | 49         | M     | Cultivateur       | chien              | juin 2016         | Tahoudi            | Oui: 1 et 3                 | 28 aout 2016  | Bondoukou          |
| 34                      | 3          | F     | Sans              | Chiot              | mai 2016          | Tabou (Para)       | Oui: 1 et 3                 | 22 aout 2016  | Tabou              |
| 35                      | 11         | M     | élève             | chien              | 25 juin 2016      | Duekoué            | Oui: 2                      | 26 aout 2016  | Duékoué            |
| 41                      | 10         | F     | élève             | chien              | 1er Sept 2016     | Yabligué           | Oui: 1 et 3                 | 15-oct        | Bangolo            |
| 44                      | 46         | M     | Cultivateur       | chien              | 03-sept-16        | Katoumara          | Oui: 1 et 3                 | 08-nov        | Korhogo            |
| 47                      | 22         | M     | Agent de sécurité | chien              | 23 Aout 2016      | Abobo              | Oui: 1 et 3                 | 26-nov-16     | Abobo-Ouest        |
| 48                      | 15         | F     | Elève             | Chien              | Aout 2016         | Daloa (Brizéboua)  | Oui: 2                      | 30-nov-16     | Daloa              |
| 49                      | 65         | M     | Cultivateur       | Chien              | 08-oct-16         | Data (Divo)        | Oui: 1 et 3                 | 12-déc-16     | Divo               |
