# Supplementary material for: Human rabies in Côte d'Ivoire 2014-2016: Results following reinforcements to rabies surveillance
Source: PubMed Central journal article supplement (PMC6126804; doi:10.1371/journal.pntd.0006649), 2018-09-06
Supplement: pntd.0006649.s005.pdf [file pntd.0006649.s005.pdf]

**Tableau 1 : Répartition des personnes exposées par antenne INHP (calcul d'incidence) 2014-2016**

| Centre d'INHP  | Population | No. morsures | No. morsures | No. morsures | Somme | Taux d'incidence (/100 000) | Taux d'incidence (/100 000) | Taux d'incidence (/100 000) | Moyen taux d'incidence (/100 000) |
|----------------|------------|--------------|--------------|--------------|-------|-----------------------------|-----------------------------|-----------------------------|-----------------------------------|
|                |            | 2014         | 2015         | 2016         |       | 2014                        | 2015                        | 2016                        | TOTAL                             |
| Treichville    | 1,727,420  | 2320         | 2087         | 1940         | 6347  | 134.3                       | 120.8                       | 112.3                       | 122.5                             |
| Port Bouet     | 978,726    | 281          | 497          | 523          | 1301  | 28.7                        | 50.8                        | 53.4                        | 44.3                              |
| Yopougon       | 2,983,898  | 743          | 821          | 915          | 2479  | 24.9                        | 27.5                        | 30.7                        | 27.7                              |
| Abengourou     | 580,391    | 334          | 273          | 268          | 875   | 57.5                        | 47.0                        | 46.2                        | 50.3                              |
| Agboville      | 1,031,077  | 565          | 589          | 580          | 1734  | 54.8                        | 57.1                        | 56.3                        | 56.1                              |
| Bondoukou      | 767,959    | 190          | 296          | 434          | 920   | 24.7                        | 38.5                        | 56.5                        | 39.9                              |
| Bouaké         | 1,193,011  | 729          | 766          | 908          | 2403  | 61.1                        | 64.2                        | 76.1                        | 67.1                              |
| Bouna          | 262,893    | 67           | 101          | 74           | 242   | 25.5                        | 38.4                        | 28.1                        | 30.7                              |
| Boundiali      | 240,319    | 86           | 97           | 83           | 266   | 35.8                        | 40.4                        | 34.5                        | 36.9                              |
| Dimbokro       | 932,199    | 189          | 165          | 185          | 539   | 20.3                        | 17.7                        | 19.8                        | 19.3                              |
| Divo           | 1,002,723  | 325          | 370          | 395          | 1090  | 32.4                        | 36.9                        | 39.4                        | 36.2                              |
| Ferkessedougou | 259,402    | 143          | 158          | 185          | 486   | 55.1                        | 60.9                        | 71.3                        | 62.5                              |
| Gagnoa         | 798,308    | 425          | 432          | 403          | 1260  | 53.2                        | 54.1                        | 50.5                        | 52.6                              |
| Guiglo         | 747,958    | 162          | 216          | 183          | 561   | 21.7                        | 28.9                        | 24.5                        | 25.0                              |
| Katiola        | 395,885    | 96           | 145          | 127          | 368   | 24.2                        | 36.6                        | 32.1                        | 31.0                              |
| Korhogo        | 610,844    | 342          | 374          | 414          | 1130  | 56.0                        | 61.2                        | 67.8                        | 61.7                              |
| Man            | 1,377,035  | 574          | 675          | 719          | 1968  | 41.7                        | 49.0                        | 52.2                        | 47.6                              |
| Odienné        | 447,097    | 147          | 174          | 172          | 493   | 32.9                        | 38.9                        | 38.5                        | 36.8                              |
| Ouangolodougou | 162,905    | 56           | 42           | 41           | 139   | 34.4                        | 25.8                        | 25.2                        | 28.4                              |
| Tengrela       | 93,583     | 25           | 26           | 23           | 74    | 26.7                        | 27.8                        | 24.6                        | 26.4                              |
| Touba          | 204,770    | 40           | 46           | 41           | 127   | 19.5                        | 22.5                        | 20.0                        | 20.7                              |
| Yamoussoukro   | 1,222,346  | 272          | 361          | 387          | 1020  | 22.3                        | 29.5                        | 31.7                        | 27.8                              |
| Aboisso        | 474,176    | 204          | 272          | 222          | 698   | 43.0                        | 57.4                        | 46.8                        | 49.1                              |
| Daloa          | 1,836,975  | 598          | 629          | 582          | 1809  | 32.6                        | 34.2                        | 31.7                        | 32.8                              |
| Séguéla        | 513,819    | 158          | 142          | 133          | 433   | 30.8                        | 27.6                        | 25.9                        | 28.1                              |
| San Pedro      | 1,017,997  | 368          | 367          | 401          | 1136  | 36.1                        | 36.1                        | 39.4                        | 37.2                              |

|              |                   |               |               |               |               |             |             |             |             |
|--------------|-------------------|---------------|---------------|---------------|---------------|-------------|-------------|-------------|-------------|
| Soubré       | 1,033,187         | 225           | 228           | 232           | 685           | 21.8        | 22.1        | 22.5        | 22.1        |
| Abobo        | 1,030,658         | 349           | 568           | 911           | 1828          | 33.9        | 55.1        | 88.4        | 59.1        |
| <b>Somme</b> | <b>23,927,561</b> | <b>10,013</b> | <b>10,917</b> | <b>11,481</b> | <b>32,411</b> | <b>41.8</b> | <b>45.6</b> | <b>48.0</b> | <b>45.2</b> |

**Tableau 2 : Informations sur la prise en charge des personnes exposées**

|                                                | Nombre de cas                                   | Pourcentage |
|------------------------------------------------|-------------------------------------------------|-------------|
| <b>Lavage de la plaie</b>                      |                                                 |             |
| Oui                                            | 25616                                           | 79%         |
| Non                                            | 6795                                            | 21%         |
| Ne sait pas                                    |                                                 |             |
| <b>Vaccin anti-tetanique</b>                   |                                                 |             |
| Oui                                            | 4341                                            | 13%         |
| Non                                            | 28070                                           | 87%         |
| Ne sait pas                                    |                                                 |             |
| <b>Immunoglobuline antirabique</b>             |                                                 |             |
| Oui                                            | 0                                               |             |
| Non                                            | 0                                               |             |
| Ne sait pas                                    |                                                 |             |
| <b>Protocole de vaccin antirabique</b>         |                                                 |             |
| Oui                                            | ZAGREB = 26425<br>ESSEN = 5986<br>TOTAL = 32411 | 82%<br>18%  |
| <b>Si oui, respect du calendrier vaccinal?</b> |                                                 |             |
| Oui                                            | 18239                                           | 56%         |
| Non                                            | 14172                                           | 44%         |
| Ne sait pas)                                   |                                                 |             |
| <b>Somme</b>                                   | 32411                                           | 100%        |

## Résultats d'analyse des cas de rage enregistrés en Côte d'Ivoire de 2014 à 2016

**Tableau 1 : Nature de l'exposition**

| Nature Exposition | Fréquence | Pourcentage |
|-------------------|-----------|-------------|
| Morsure           | 48        | 96.00%      |
| Griffure          | 2         | 4.00%       |
| Léchage           | 0         | 0.00%       |
| Somme             | 50        | 100.00%     |
|                   |           |             |

**Tableau 2 : animal responsable**

| Animal responsable | Fréquence | Pourcentage |
|--------------------|-----------|-------------|
| Chien              | 48        | 96.00%      |
| Chat               | 2         | 4.00%       |
| Somme              | 50        | 100.00%     |

**Tableau 3 : Provenance des cas**

| Localité | Fréquence | Pourcentage |
|----------|-----------|-------------|
| Village  | 33        | 66.00%      |
| Ville    | 17        | 34.00%      |
| Somme    | 50        | 100.00%     |

**Tableau 4 : Lavage des plaies**

| Lavage Plaie | Fréquence | Pourcentage |
|--------------|-----------|-------------|
| Oui          | 5         | 10.00%      |
| Non          | 45        | 90.00%      |
| Somme        | 50        | 100.00%     |

**Tableau 5 : Injection contre tétanos**

| Injection de Sérum antitétanique | Fréquence | Pourcentage |
|----------------------------------|-----------|-------------|
| Oui                              | 7         | 14.90%      |
| Non                              | 40        | 85.10%      |
| Inconnu                          | 3         | 0.06%       |
| Somme                            | 50        | 100.00%     |

**Tableau 6 : Prélèvement d'échantillons**

| Prélèvement Echantillons | Fréquence | Pourcentage |
|--------------------------|-----------|-------------|
| Oui                      | 39        | 78.00%      |
| Non                      | 11        | 22.00%      |
| Somme                    | 50        | 100.00%     |

**Tableau 7 : Résultat analyse échantillons**

| Forme Rage       | Fréquence | Pourcentage |
|------------------|-----------|-------------|
| Rage Furieuse    | 49        | 98.00%      |
| Rage Paralytique | 1         | 2.00%       |
| Somme            | 50        | 100.00%     |

**Tableau 8 : Forme de rage**

| Résultat Laboratoire | Fréquence | Pourcentage |
|----------------------|-----------|-------------|
| Confirmés            | 32        | 82.10%      |
| Non traités          | 7         | 17.90%      |
| Somme                | 39        | 100.00%     |

**Tableau 9 : Répartition par sexe**

| Sexe  | Fréquence | Pourcentage |
|-------|-----------|-------------|
| F     | 22        | 44.00%      |
| M     | 28        | 56.00%      |
| Somme | 50        | 100.00%     |

**Tableau 10 : Répartition des cas par groupe d'âge**

| Age Groupe     | Fréquence | Pourcentage |
|----------------|-----------|-------------|
| 0 à 5 ans      | 8         | 16.00%      |
| 6 à 15 ans     | 15        | 30.00%      |
| Plus de 15 ans | 27        | 54.00%      |
| Somme          | 50        | 100.00%     |

**Tableau 11 : Répartition des groupes d'âge selon la provenance**

| Age Groupe     | Village | Ville | TOTAL |
|----------------|---------|-------|-------|
| 0 à 5 ans      | 4       | 4     | 8     |
| 6 à 15 ans     | 8       | 7     | 15    |
| Plus de 15 ans | 21      | 6     | 27    |
| Somme          | 33      | 17    | 50    |

**Tableau 12 : cas prélevés en rapport avec la notion d'hospitalisation**

| Hospitalisation | PRELEVECHANTILLONS |    |       |
|-----------------|--------------------|----|-------|
|                 | Yes                | No | TOTAL |
| Oui             | 31                 | 7  | 38    |
| Non             | 8                  | 4  | 12    |
| Somme           | 39                 | 11 | 50    |

**Tableau13 : Répartition des victimes selon la profession**

| Profession      | Fréquence | Pourcentage |
|-----------------|-----------|-------------|
| Agent sécurité  | 2         | 4.00%       |
| Elève           | 14        | 28.00%      |
| Menagère        | 10        | 20.00%      |
| Neant (bas âge) | 6         | 12.00%      |
| Planteur        | 9         | 18.00%      |
| Prof libérale   | 3         | 6.00%       |
| Sans emploi     | 6         | 12.00%      |
| Somme           | 50        | 100.00%     |

**Tableau 14 : Notion de Vaccination Anti-rab chez les victimes**

| Vaccin Anti-Rab | Fréquence | Pourcentage |
|-----------------|-----------|-------------|
| Oui             | 8         | 16.00%      |
| Non             | 42        | 84.00%      |
| Somme           | 50        | 100.00%     |

**Tableau de distribution des cas de rage de 2014 à 2016 par district sanitaire**

| Districts sanitaires | Cas 2014  | Cas 2015  | Cas 2016  | Somme     |
|----------------------|-----------|-----------|-----------|-----------|
| Abengourou           | 2         | 0         | 0         | 2         |
| Abobo Ouest          | 0         | 0         | 2         | 2         |
| Adzope               | 0         | 0         | 1         | 1         |
| Anyama               | 0         | 1         | 0         | 1         |
| Bangolo              | 0         | 0         | 1         | 1         |
| Bettie               | 1         | 0         | 0         | 1         |
| Bingerville          | 0         | 0         | 1         | 1         |
| Bondoukou            | 0         | 1         | 1         | 2         |
| Bouake               | 1         | 0         | 0         | 1         |
| Bouna                | 0         | 1         | 0         | 1         |
| Boundiali            | 0         | 1         | 0         | 1         |
| Daloa                | 1         | 2         | 1         | 4         |
| Divo                 | 1         | 2         | 2         | 5         |
| Duékoué              | 0         | 0         | 1         | 1         |
| Ferkessédougou       | 1         | 0         | 0         | 1         |
| Gagnoa               | 1         | 1         | 1         | 3         |
| Guiglo               | 0         | 0         | 2         | 2         |
| Korhogo              | 0         | 2         | 1         | 3         |
| Kouibly              | 1         | 0         | 0         | 1         |
| Man                  | 0         | 1         | 0         | 1         |
| Nassian              | 0         | 1         | 0         | 1         |
| Odienne              | 1         | 0         | 0         | 1         |
| Oume                 | 0         | 0         | 1         | 1         |
| San Pédro            | 1         | 1         | 1         | 3         |
| Seguela              | 2         | 0         | 0         | 2         |
| Sikensi              | 0         | 1         | 0         | 1         |
| Soubre               | 0         | 2         | 0         | 2         |
| Tabou                | 1         | 0         | 0         | 1         |
| Tiassalé             | 0         | 0         | 1         | 1         |
| Vavoua               | 0         | 0         | 1         | 1         |
| Yopougon Ouest       | 1         | 0         | 0         | 1         |
| <b>TOTAL</b>         | <b>15</b> | <b>17</b> | <b>18</b> | <b>50</b> |

**Tableau de Notification des cas de rage humaine 2014 à 2016 par antenne INHP**

| <b>Antenne</b>  | <b>Cas 2014</b> | <b>Cas 2015</b> | <b>Cas 2016</b> | <b>Somme</b> |
|-----------------|-----------------|-----------------|-----------------|--------------|
| Abengourou      | 3               | 0               | 0               | 3            |
| Abobo           | 0               | 0               | 2               | 2            |
| Adzope          | 0               | 0               | 1               | 1            |
| Bondoukou       | 0               | 2               | 1               | 3            |
| Bouake          | 1               | 0               | 0               | 1            |
| Bouna           | 0               | 1               | 0               | 1            |
| Boundiali       | 0               | 1               | 0               | 1            |
| CAR Treichville | 0               | 2               | 2               | 4            |
| Daloa           | 1               | 2               | 1               | 4            |
| Divo            | 0               | 2               | 2               | 4            |
| Ferkessedougou  | 1               | 0               | 0               | 1            |
| Gagnoa          | 2               | 1               | 2               | 5            |
| Guiglo          | 0               | 0               | 4               | 4            |
| Korhogo         | 0               | 2               | 1               | 3            |
| Man             | 1               | 1               | 0               | 2            |
| Odiene          | 1               | 0               | 0               | 1            |
| San Pédro       | 2               | 1               | 1               | 4            |
| Seguela         | 2               | 0               | 1               | 3            |
| Soubre          | 0               | 2               | 0               | 2            |
| Yopougon        | 1               | 0               | 0               | 1            |
| <b>TOTAL</b>    | <b>15</b>       | <b>17</b>       | <b>18</b>       | <b>50</b>    |
